# Supplementary material for: Optimization of the Silver Nanoparticles PEALD Process on the Surface of 1-D Titania Coatings
Source: PubMed Central journal article supplement (PMC5535259; doi:10.3390/nano7070193), 2017-07-24
Supplement: nanomaterials-07-00193-s001.pdf [file nanomaterials-07-00193-s001.pdf]

Supplementary material: Figure S1 – Figure S4

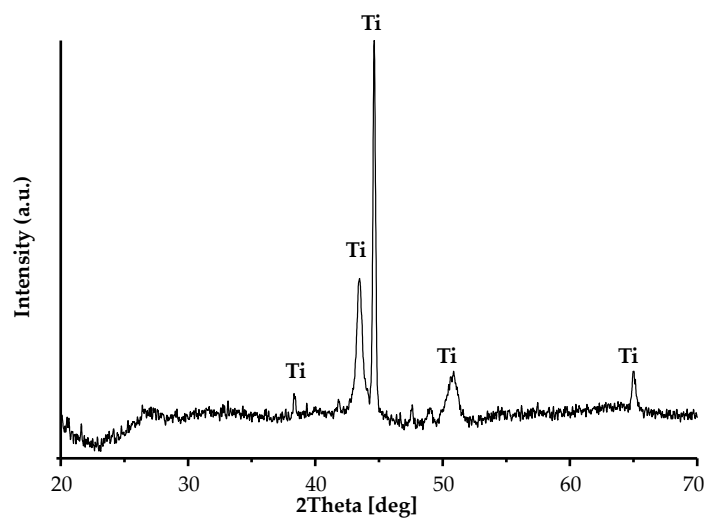

Figure S1. GAXRD spectrum of TNT20

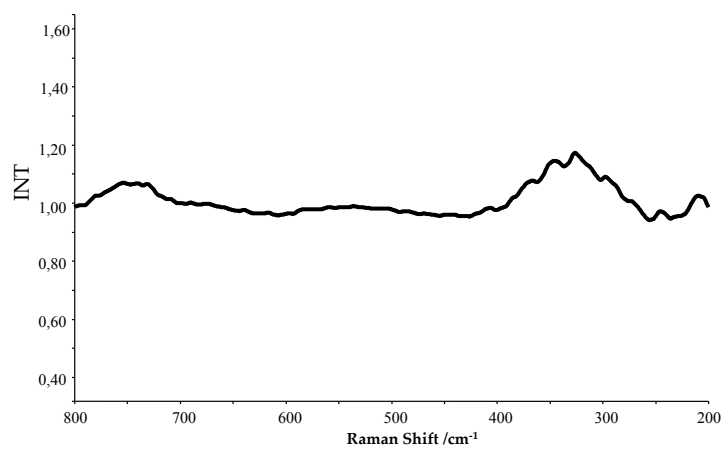

Figure S2. Raman spectrum of TNT20

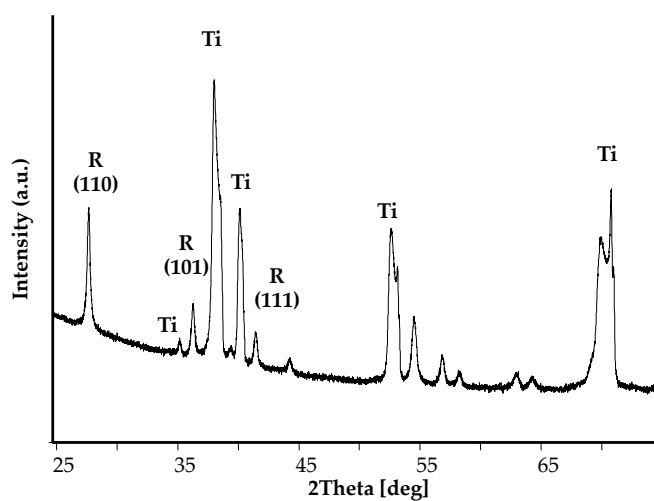

Figure S3. GAXRD spectrum of TNN475

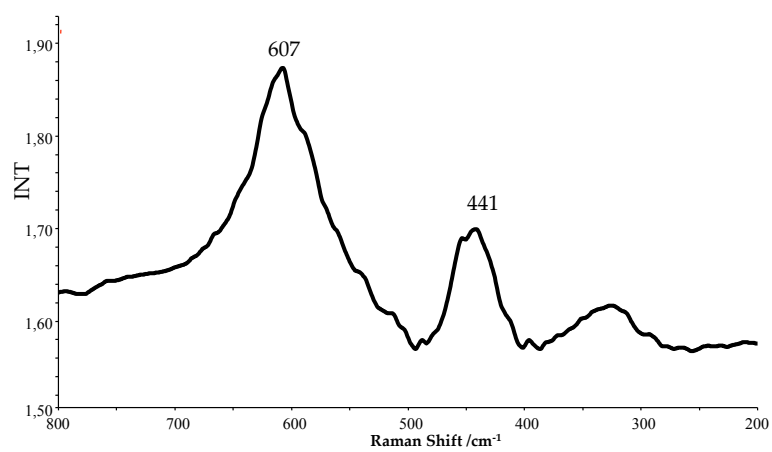

Figure S4. Raman spectrum of TNN475
